# Supplementary material for: DASH/Dam1 complex mutants stabilize ploidy in histone‐humanized yeast by weakening kinetochore‐microtubule attachments
Source: PubMed Central journal article supplement — EMBO J. 2023 Jan 18;42(8):e112600. doi: 10.15252/embj.2022112600 (PMC10106983; doi:10.15252/embj.2022112600), 2023-01-18
Supplement: EMBJ-42-e112600-s009.pdf [file EMBJ-42-e112600-s009.pdf]

## APPENDIX

### **DASH/Dam1 complex mutants stabilize ploidy in histone-humanized yeast by weakening kinetochore-microtubule attachments**

Max A. B. Haase<sup>1,2</sup>, Guðjón Ólafsson<sup>1†</sup>, Rachel L. Flores<sup>3†</sup>, Emmanuel Boakye-Ansah<sup>3</sup>, Alex Zelter<sup>3</sup>, Miles Sasha Dickinson<sup>3</sup>, Luciana Lazar-Stefanita<sup>1</sup>, David M. Truong<sup>6,7</sup>, Charles L. Asbury<sup>3,4</sup>, Trisha N. Davis<sup>3</sup>, Jef D. Boeke<sup>1,5,6 \*@</sup>

<sup>1</sup>Institute for Systems Genetics and Department of Biochemistry and Molecular Pharmacology, NYU Langone Health, 430 East 29th Street, New York, 10016, USA

<sup>2</sup>Vilcek Institute of Graduate Biomedical Sciences, NYU School of Medicine, New York, NY, 10016, USA

<sup>3</sup>Department of Biochemistry, University of Washington, Seattle, United States.

<sup>4</sup>Department of Physiology and Biophysics, University of Washington, Seattle, United States

<sup>5</sup>Department of Biochemistry and Molecular Pharmacology, NYU Langone Health, New York, NY 10016, USA

<sup>6</sup>Department of Biomedical Engineering, NYU Tandon School of Engineering, Brooklyn, NY, 11201, USA

<sup>7</sup>Department of Pathology, NYU Langone Health, New York, NY, 10016, USA

\*Corresponding author

@Lead Contact

†Equal Contribution

## Table of Contents

|                                                                                                                                                 |    |
|-------------------------------------------------------------------------------------------------------------------------------------------------|----|
| <i>Appendix Figure S1. Protein-protein interaction network of candidate suppressors of human histones.</i> .....                                | 3  |
| <i>Appendix Figure S2. Chromosome aneuploidy evolution in yHs lineages.</i> .....                                                               | 4  |
| <i>Appendix Figure S3. Transcription at chromosomal CEN6 in wild type and histone-humanized yeasts.</i> .....                                   | 5  |
| <i>Appendix Figure S4. DAD1<sup>E50D</sup> drives euploidization in a heterozygous state.</i> .....                                             | 6  |
| <i>Appendix Figure S5. Chromosome copy number of each clone from aneuploidy reduction experiment.</i> .....                                     | 7  |
| <i>Appendix Figure S6. DASH/Dam1c mutants rescue Aurora B kinase <i>ipl1-2</i> mutant.</i> .....                                                | 8  |
| <i>Appendix Figure S7 Humanization rates of <i>dam1</i> residue 80 mutants and DAM1<sup>N80Y</sup> <i>dad1</i><sup>E50A</sup> mutant.</i> ..... | 9  |
| <i>Appendix Figure S8. PCR genotyping of DAD1 in spores from heterozygous cross.</i> .....                                                      | 10 |
| <i>Appendix Table S1. Candidate Suppressor mutations by lineage.</i> .....                                                                      | 11 |
| <i>Appendix Table S2. Aneuploidy abundance in histone-humanized yeasts.</i> .....                                                               | 14 |
| <i>Appendix Table S3. Strains used in this study.</i> .....                                                                                     | 17 |
| <i>Appendix Table S4. Plasmids used in this study.</i> .....                                                                                    | 22 |
| <i>Appendix Table S5. DNA oligos used in this study.</i> .....                                                                                  | 23 |
| <i>Appendix Table S6. Sporulation in Dad1-E50D diploids.</i> .....                                                                              | 27 |

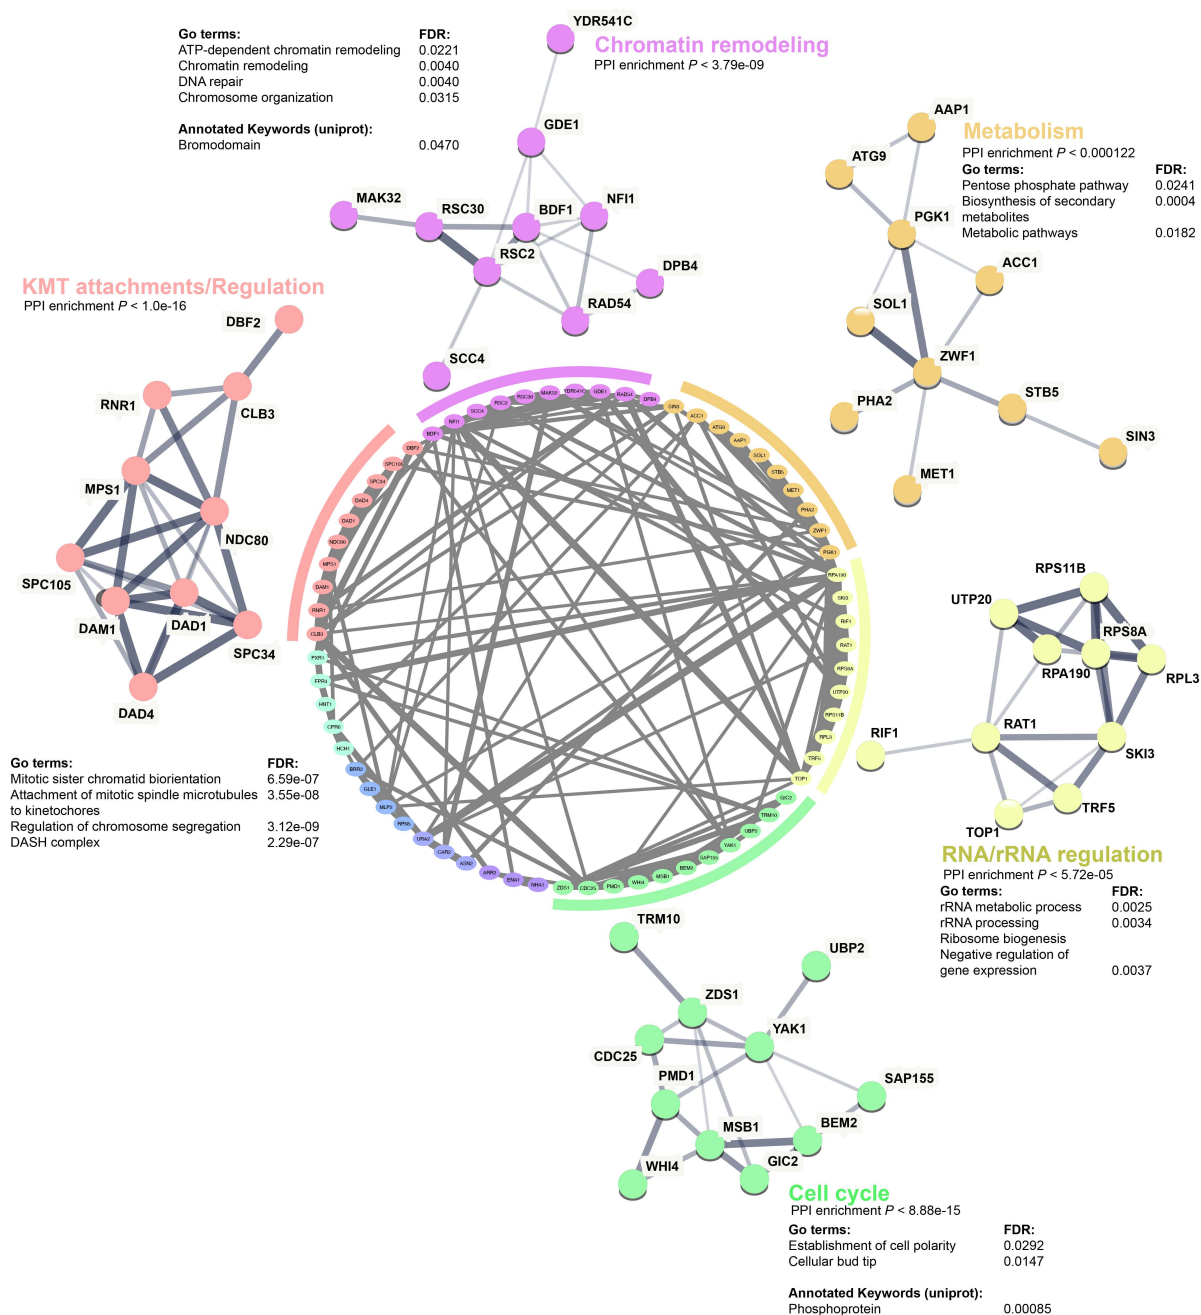

**Appendix Figure S1. Protein-protein interaction network of candidate suppressors of human histones.** String database analysis of protein-protein interactions (PPI) considering missense, nonsense, and noncoding mutations identified in histone humanized lineages (Table EV1 and Truong and Boeke, 2017). The network was clustered using MCL clustering with the inflation parameter set to 1.8, clusters are colored, with PPI depicted as gray connecting lines. The number of PPI in the global network was significantly enriched from background (PPI enrichment  $p = 0.0049$ ). Local PPI networks are shown for clusters containing more than 10 interactors, with PPI enrichment  $p$ -values shown, alongside Go term enrichment terms and Uniprot keywords. Network was constructed using the interaction sources: “textmining”, “experiments”, “databases”, and “co-expression”. The width of each edge represents the strength of interaction between nodes based on available evidence. Disconnected nodes were removed for clarity.

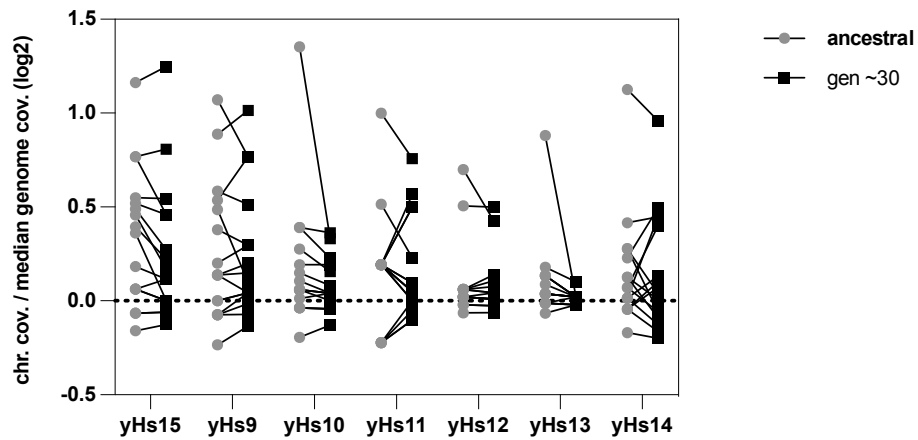

*Appendix Figure S2. Chromosome aneuploidy evolution in yHs lineages.* For each histone–humanized lineage (ancestral, gray circles; and evolved, black squares) we plot the median log<sub>2</sub> coverage ratio (chromosome divided by median of genome) for each chromosome.

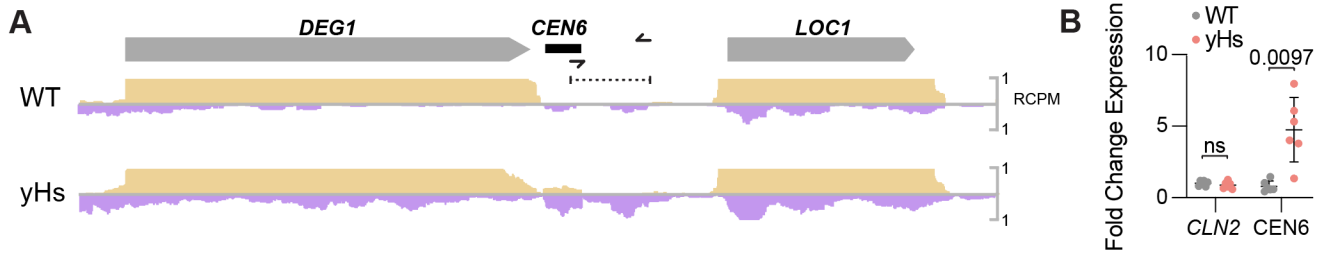

**Appendix Figure S3. Transcription at chromosomal CEN6 in wild type and histone-humanized yeasts.** (a) The region around centromere VI is shown, with read coverage (read counts per million) for the forward (yellow) and reverse (purple) strands. The region amplified for RT- and qRT-PCR is shown by the two arrow heads and region highlighted in a bracket. (b) Quantitative RT-PCR of CEN6 RNA in WT and histone humanized strains. Expression levels of CLN2 and CEN6 were normalized to the expression level of *UBC6* (see Appendix Table S5).

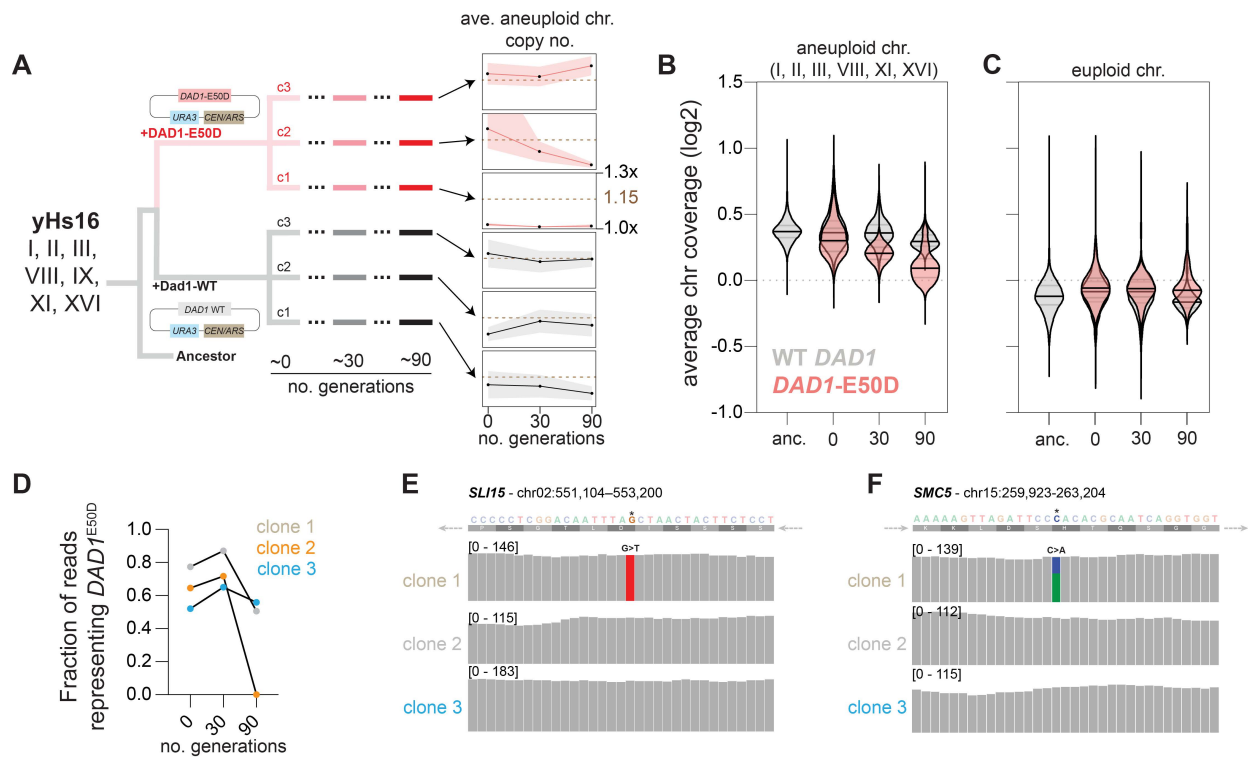

**Appendix Figure S4. *DAD1*<sup>E50D</sup> drives euploidization in a heterozygous state.**

**(a)** Overview of experimental design and ploidy evolution for each clone. Left, histone-humanized clone yH16 was transformed with a CEN/ARS plasmids encoding either the wild type *DAD1* gene or mutant *DAD1*<sup>E50D</sup> gene. Three clones were selected and passaged for 90 generations in SC-Ura, to maintain selection of the CEN/ARS plasmid. Genomic DNA was isolated and sequenced to infer chromosome copy numbers. Right, plots of the average chromosome copy number for the ancestral aneuploid chromosomes (I, II, III, VIII, IX, XI, and XVI) at each time point (shaded area represents the standard deviation between the three biological replicates). **(b)** Log2 ratio (chromosome divided by the genome median) chromosomal coverage for the parental aneuploid chromosomes. **(c)** Same as in panel b, however shown for the parental euploid chromosomes. **(d)** Ratio of reads corresponding to the mutant *DAD1*<sup>E50D</sup> allele for clones transformed with the pRS416-*DAD1*<sup>E50D</sup> plasmid across each timepoint. **(e)** Genome browser track for the *SLI15* gene, the DNA shown is the Crick strand and represents the template strand of *SLI15* (note the arrow of the direction indicates the orientation of *SLI15*). **(f)** Genome browser track for the *SMC5* gene.

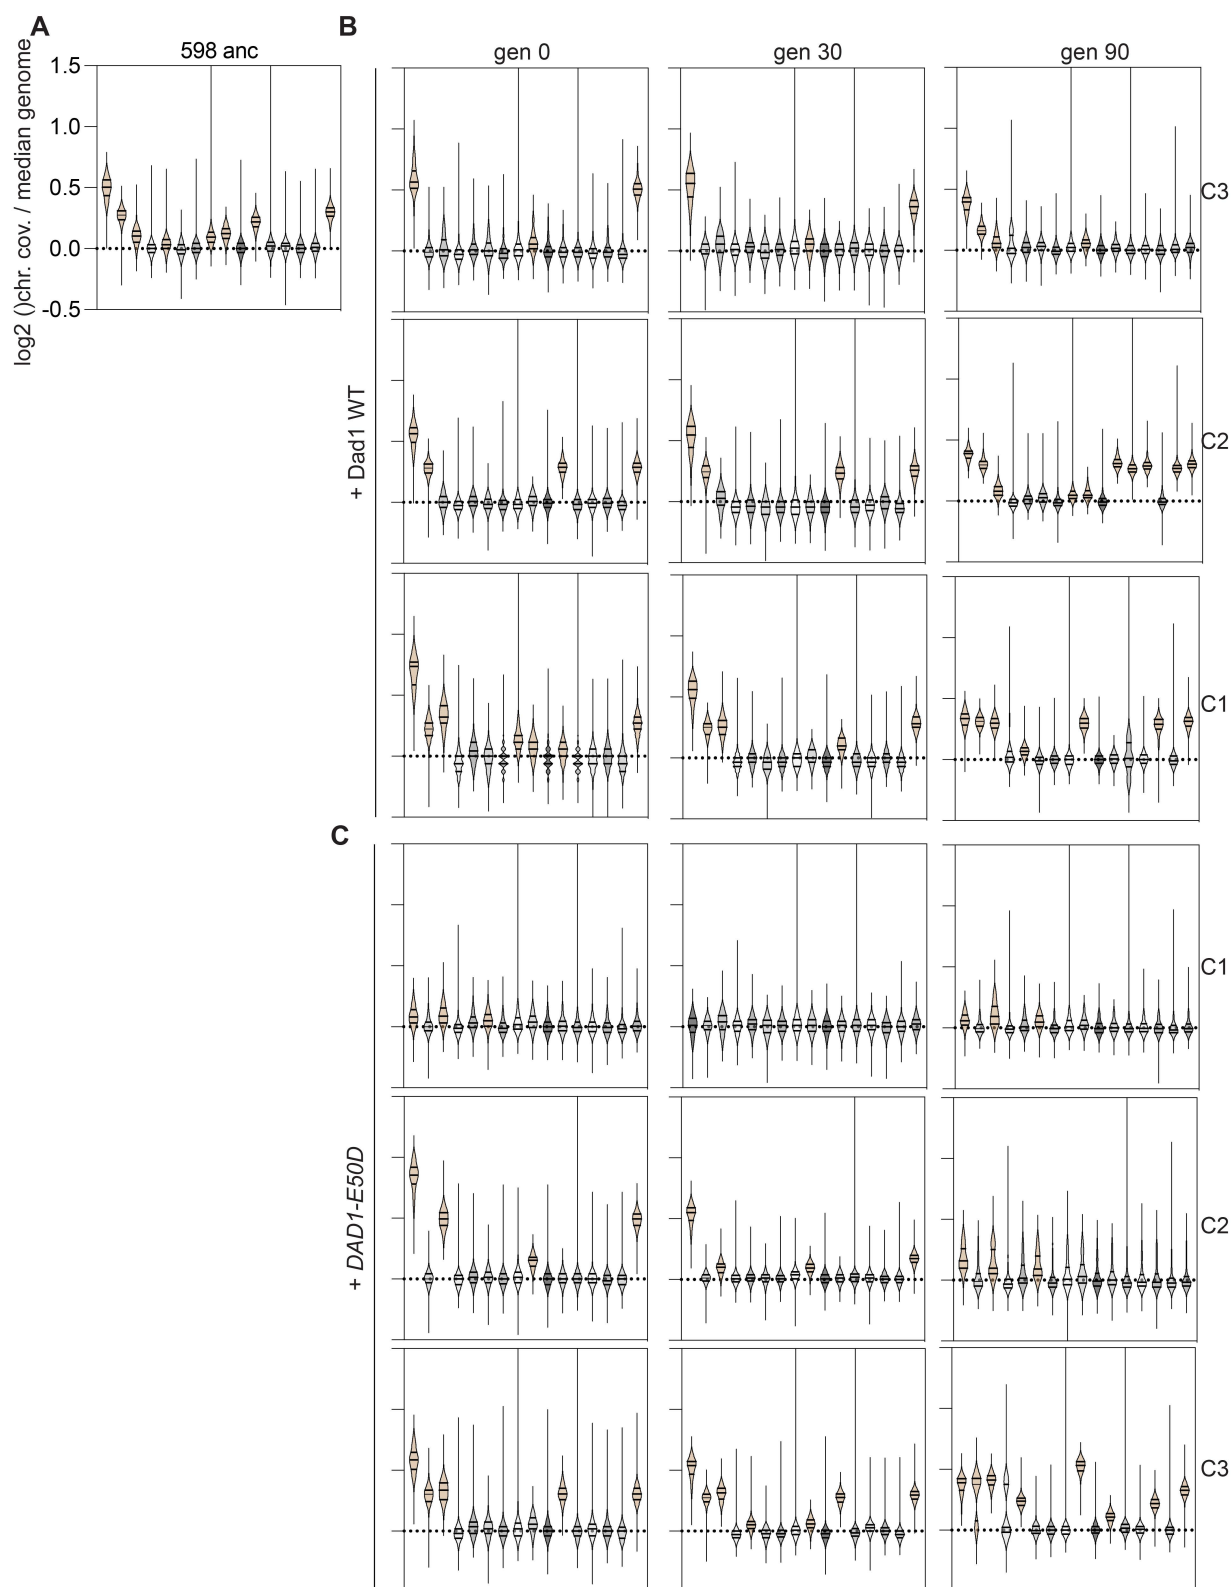

**Appendix Figure S5. Chromosome copy number of each clone from aneuploidy reduction experiment. (a)** Chromosome coverage for the ancestral strain prior to transformation with the CEN/ARS plasmid. Violin plots shaded brown are indicated to be aneuploid. **(b)** Chromosome coverage for the clones transformed with wild type *DAD1*. **(c)** Chromosome coverage for the clones transformed with mutant *DAD1*<sup>E50D</sup>.

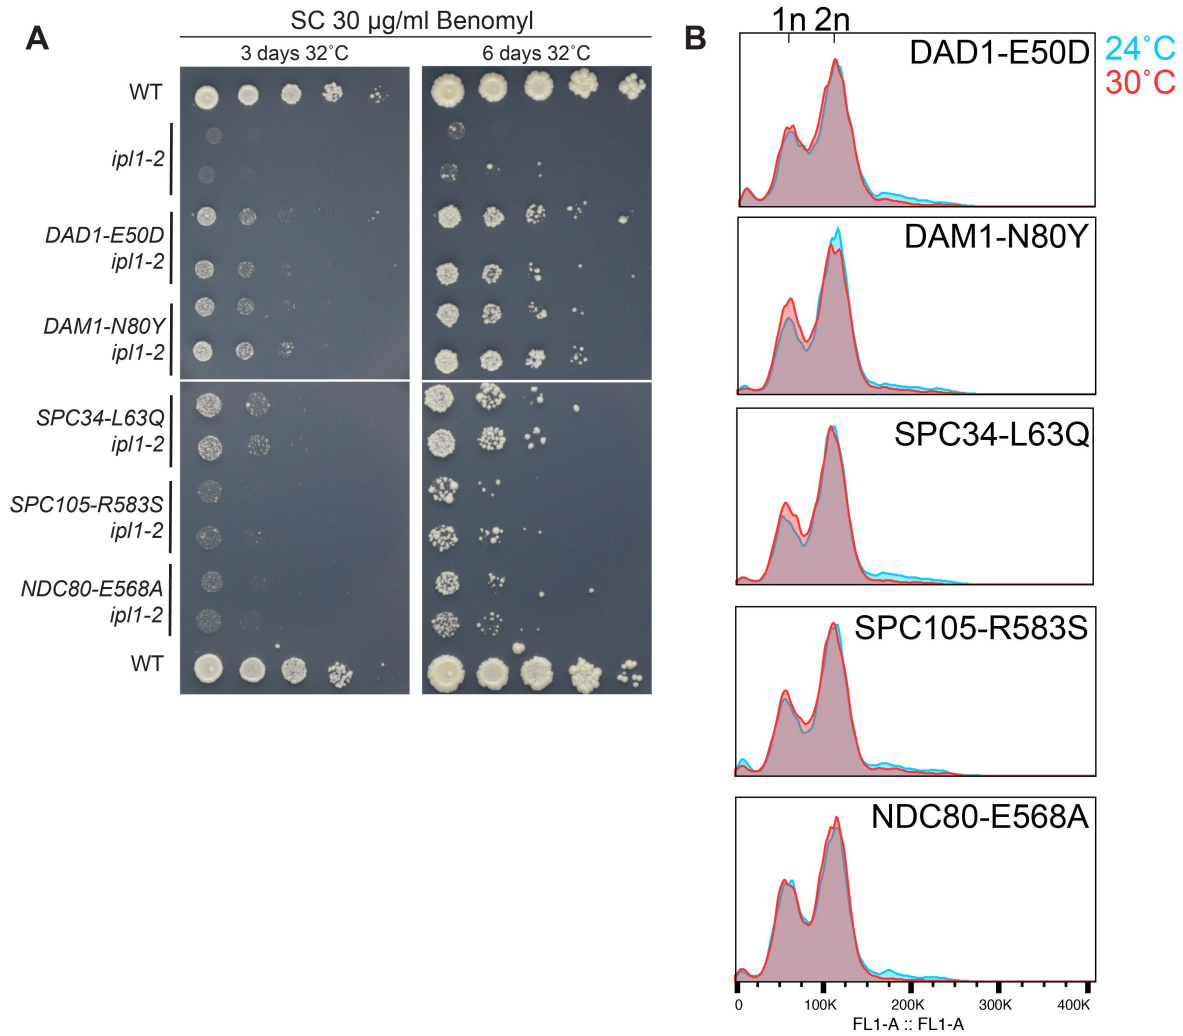

Appendix Figure S6. **DASH/Dam1c mutants rescue Aurora B kinase *ipl1-2* mutant.** (a) Growth assays of suppressor mutants with the *ipl1-2* temperature sensitive mutant on SC medium with 30  $\mu\text{g/ml}$  of benomyl. (b) Cell cycle analysis of the indicated mutant at 24°C and 30°C. Yeast cultures were grown to logarithmic phase at 24°C and divided and grown at 24°C and 30°C for 6 hours before cells were collected and processed for DNA content analysis using Sytox Green stain.



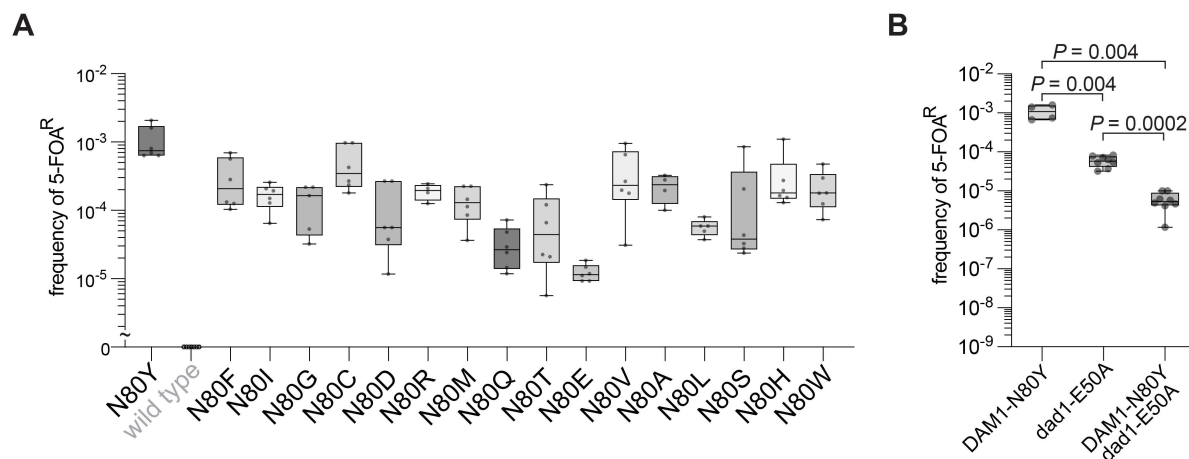

Appendix Figure S7. **Humanization rates of *dam1* residue 80 mutants and *DAM1*<sup>N80Y</sup> *dad1*<sup>E50A</sup> mutant.** (a) Humanization rates (5-FOA<sup>R</sup> frequency) for the missense mutants of *dam1* residue 80. (b) Humanization rates (5-FOA<sup>R</sup> frequency) of the single and double mutants *dad1*<sup>E50A</sup> and *DAM1*<sup>N80Y</sup>.

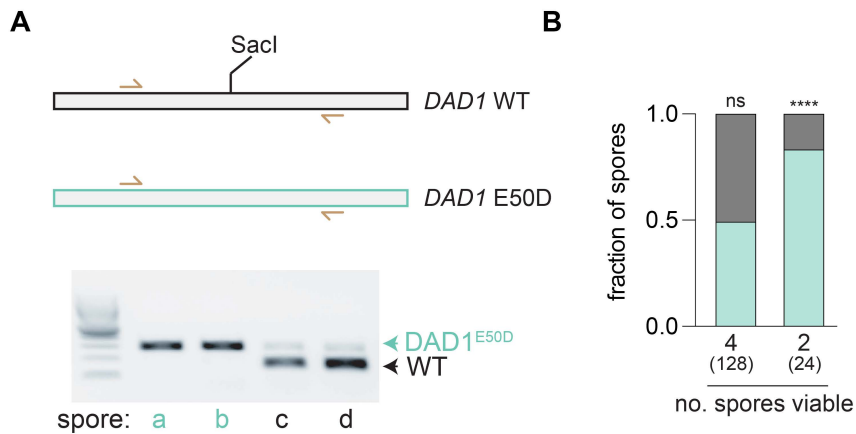

**Appendix Figure S8. PCR genotyping of DAD1 in spores from heterozygous cross.** (a) Schematic and example of the PCR digestion genotype assay used. Briefly, the *DAD1* locus is PCR amplified and then digested with the *SacI* enzyme, which only cuts the wild type allele. Digestions are then visualized on a 1% agarose gel. (b) Genotyping of spores isolated from tetrads with either four viable spores or two viable spores. Fraction of spores with the indicated allele (gray *DAD1*WT and cyan *DAD1*E50D) is displayed. The one-tailed binomial test is shown for the probability of observing the frequency of the *DAD1*E50D allele given equal segregation (*DAD1*WT,  $P = 0.46$ ; *DAD1*E50D,  $P = 0.0011$ ). Numbers in parenthesis indicates the total number of spores genotyped.

| <b>Appendix Table S1. Candidate Suppressor mutations by lineage.</b> |                 |               |                                                                                                                   |                                                                    |
|----------------------------------------------------------------------|-----------------|---------------|-------------------------------------------------------------------------------------------------------------------|--------------------------------------------------------------------|
| <b>Mutant</b>                                                        | <b>Isolate</b>  | <b>Strain</b> | <b>Mutations</b>                                                                                                  | <b>Likely innocuous mutations</b>                                  |
| yHs9                                                                 | yHs9evo0_pool   | yMAH0344      | –                                                                                                                 | –                                                                  |
|                                                                      | yHs9evo5_pool   | yMAH0393      | –                                                                                                                 | –                                                                  |
|                                                                      | yHs9evo5_C1     | yMAH531       | –                                                                                                                 | <i>gle1(-8)</i><br><i>rif1(-264)</i><br><i>car2(-168)</i>          |
|                                                                      | yHs9evo5_C2     | yMAH532       | <i>dad4(N61K)</i> <i>YPL216W(K290Stop)</i> <i>gic2(G133S)</i>                                                     | <i>gle1(-8)</i><br><i>rif1(-264)</i>                               |
|                                                                      | yHs9evo5_C3     | yMAH533       | <i>gic2(G133S)</i>                                                                                                | –                                                                  |
| yHs10                                                                | yHs10_evo0_pool | yMAH0345      | <i>bdf1(E474D)</i>                                                                                                | <i>trm732(A104A)</i><br><i>gde1(R873R)</i>                         |
|                                                                      | yHs10_evo5_pool | yMAH0394      | <i>bdf1(E474D)</i>                                                                                                | <i>trm732(A104A)</i><br><i>gde1(R873R)</i>                         |
| yHs11                                                                | yHs11_evo0_pool | yMAH0346      | –                                                                                                                 | –                                                                  |
|                                                                      | yHs11_evo5_pool | yMAH0395      | <i>rnr1(P144T)</i> <i>sin3(F470Y)</i>                                                                             | <i>suf6-1</i><br><i>fre1(-183)</i>                                 |
|                                                                      | yHs11_evo5_C2   | yMAH536       | <i>vps8(Q116H)</i> <i>pmd1(V895F)</i> <i>rnr1(P144T)</i> <i>sin3(F470Y)</i> <i>rpn5(E120A)</i>                    | <i>hch1(-88)</i><br><i>suf6-1</i>                                  |
| yHs12                                                                | yHs12_evo0_pool | yMAH0347      | –                                                                                                                 | –                                                                  |
|                                                                      | yHs12_evo5_pool | yMAH0396      | <i>ecm4(M84I)</i> <i>rnp1(K115R)</i> <i>aus1(A1189V)</i> <i>rpl3(T296I)</i> <i>rpa190(E23G)</i>                   | –                                                                  |
|                                                                      | yHs12_evo5_C1   | yMAH456       | <i>yak1(Q77E)</i> <i>ecm4(M84I)</i> <i>rnp1(K115R)</i> <i>aus1(A1189V)</i> <i>rpl3(T296I)</i> <i>rpa190(E23G)</i> | –                                                                  |
| yHs13                                                                | yHs13_evo0_pool | yMAH0348      | <i>dam1(N80Y)</i>                                                                                                 | –                                                                  |
|                                                                      | yHs13_evo5_pool | yMAH0397      | <i>rat1(N650K)</i> <i>dam1(N80Y)</i>                                                                              | –                                                                  |
| yHs14                                                                | yHs14_evo0_pool | yMAH0349      | –                                                                                                                 | –                                                                  |
|                                                                      | yHs14_evo5_pool | yMAH0398      | <i>cdc25(N1574H)</i>                                                                                              | –                                                                  |
|                                                                      | yHs14_evo5_C1   | yMAH538       | <i>aap1(G226S)</i> <i>cdc25(N1574H)</i>                                                                           | <i>mne1(V267V)</i><br><i>ura2(S1442S)</i><br><i>YDR541C(+152)*</i> |
| yHs15                                                                | yHs15_evo0_pool | yMAH0343      | –                                                                                                                 | –                                                                  |

|              |                        |                 |                                                                                                                                                                           |                                                                                                                         |
|--------------|------------------------|-----------------|---------------------------------------------------------------------------------------------------------------------------------------------------------------------------|-------------------------------------------------------------------------------------------------------------------------|
|              | <i>yHs15_evo5_pool</i> | <i>yMAH0392</i> | –                                                                                                                                                                         | –                                                                                                                       |
|              | <i>yHs15_evo5_C1</i>   | <i>yMAH528</i>  | <i>acc1(Q455R)</i>                                                                                                                                                        | <i>rps8A(+39)</i><br><i>ts(AGA)D3(C&gt;A;</i><br><i>186560)</i>                                                         |
|              | <i>yHs15_evo5_C2</i>   | <i>yMAH529</i>  | <i>acc1(Q455R)</i>                                                                                                                                                        | –                                                                                                                       |
|              | <i>yHs15_evo5_C3</i>   | <i>yMAH530</i>  | <i>acc1(Q455R)</i>                                                                                                                                                        | –                                                                                                                       |
| <i>yHs16</i> | <i>yHs16_evo0_pool</i> | <i>yMAH0598</i> | <i>utp20(E1318D) atg9(A546E) avl9(S427C) YLR125W(S82Stop) nha1(L599Stop) ubp2(K405Q)</i>                                                                                  | <i>mps1(–221)</i><br><i>ret2(A299A)</i><br><i>)</i><br><i>YLR123C(L8L)</i>                                              |
|              | <i>yHs16_evo0_C1</i>   | <i>yMAH865</i>  | <i>utp20(E1318D) atg9(A546E) avl9(S427C) YLR125W(S82Stop) nha1(L599Stop) ubp2(K405Q)</i>                                                                                  | <i>ret2(A299A)</i><br><i>)</i><br><i>YLR123C(L8L)</i>                                                                   |
|              | <i>yHs16_evo0_C2</i>   | <i>yMAH866</i>  | <i>rps11B(Q8H) apl5(S905A) arr2(G59R) utp20(E1318D) atg9(A546E) avl9(S427C) YLR125W(S82Stop) nha1(L599Stop) ubp2(K405Q)</i>                                               | <i>ret2(A299A)</i><br><i>)</i><br><i>YLR123C(L8L)</i>                                                                   |
|              | <i>yHs16_evo0_C3</i>   | <i>yMAH867</i>  | <i>rad54(K588E) mlp2(E377Stop) msb1(D243V) top1(E713stop) utp20(E1318D) avl9(S427C) YLR125W(S82Stop) nha1(L599Stop) ubp2(K405Q)</i>                                       | <i>asn2(–437)</i><br><i>tcd2(–37)</i><br><i>ret2(A299A)</i><br><i>)</i><br><i>YLR123C(L8L)</i>                          |
|              | <i>yHs16_evo0_C4</i>   | <i>yMAH868</i>  | <i>hnt1(M15I) dpb2(P110T) pxr1(E210stop) YHL017W(E473D) zwf1(G228D) utp20(E1318D) avl9(S427C) YLR125W(S82Stop) nha1(L599Stop) ubp2(K405Q)</i>                             | <i>met1(V36V)</i><br><i>)</i><br><i>mag2(T405T) lto1(–222)</i><br><i>ret2(A299A)</i><br><i>)</i><br><i>YLR123C(L8L)</i> |
|              | <i>yHs16_evo0_C5</i>   | <i>yMAH869</i>  | <i>rad54(K588E) rsc30(D571G) mlp2(E377Stop) msb1(D243V) rsc2(P861T) top1(E713stop) ski3(A1427S) utp20(E1318D) avl9(S427C) YLR125W(S82Stop) nha1(L599Stop) ubp2(K405Q)</i> | <i>mcm6(–1188)</i><br><i>asn2(–437)</i><br><i>tcd2(–37)</i><br><i>ret2(A299A)</i><br><i>)</i><br><i>YLR123C(L8L)</i>    |

|  |                      |                |                                                                                                                                          |                                                                          |
|--|----------------------|----------------|------------------------------------------------------------------------------------------------------------------------------------------|--------------------------------------------------------------------------|
|  | <i>yHs16_evo0_C6</i> | <i>yMAH870</i> | <i>rsc3(M641I) arg1(R367stop) bbp1(+230) aos1(Q121R) utp20(E1318D) avl9(S427C)</i><br><i>YLR125W(S82Stop) nha1(L599Stop) ubp2(K405Q)</i> | <i>msg5(+292)</i><br>)<br><i>ret2(A299A)</i><br>)<br><i>YLR123C(L8L)</i> |
|--|----------------------|----------------|------------------------------------------------------------------------------------------------------------------------------------------|--------------------------------------------------------------------------|

| Appendix Table S2. <i>Aneuploidy abundance in histone-humanized yeasts.</i> |           |     |     |     |    |   |    |         |      |    |   |     |     |          |         |        |     |                             |
|-----------------------------------------------------------------------------|-----------|-----|-----|-----|----|---|----|---------|------|----|---|-----|-----|----------|---------|--------|-----|-----------------------------|
| Lineage                                                                     | Strain    | I   | II  | III | IV | V | VI | VI<br>I | VIII | IX | X | XI  | XII | XII<br>I | XI<br>V | X<br>V | XVI | source                      |
| yHs1                                                                        | yHs1-pool |     |     |     |    |   |    |         |      |    |   |     | 2   |          |         |        |     | Truong and Boeke. Cell 2017 |
|                                                                             | yHs1C5    | 1   | 1   | 1   |    | 1 |    |         |      | 1  |   | 1   |     |          |         |        | 2   | Truong and Boeke. Cell 2017 |
|                                                                             | yHs1-evo  |     |     |     |    |   |    |         |      |    |   |     | 2   |          |         |        |     | Truong and Boeke. Cell 2017 |
|                                                                             | 1C5i2     |     |     |     |    |   |    |         |      |    |   |     | 2   |          |         |        |     | Truong and Boeke. Cell 2017 |
|                                                                             | 1PC5i3    |     | 1   | 1   |    |   |    |         |      |    |   |     | 2   |          |         |        |     | Truong and Boeke. Cell 2017 |
|                                                                             | 1PC5i5    |     | 1   | 1   |    |   |    |         |      |    |   |     | 2   |          |         |        |     | Truong and Boeke. Cell 2017 |
| yHs2                                                                        | yHs2-pool | 2   | 1   | 1   |    |   |    |         |      | 1  |   |     |     |          |         |        | 1.5 | Truong and Boeke. Cell 2017 |
|                                                                             | yHs2C5    | 1   | 1   | 1   |    | 1 |    |         |      | 1  |   | 1.7 |     |          |         |        | 2   | Truong and Boeke. Cell 2017 |
|                                                                             | yHs2-evo  | 3   | 1   | 1   |    | 1 |    |         | 1    | 1  |   | 1.5 |     |          |         |        | 2   | Truong and Boeke. Cell 2017 |
|                                                                             | 2PC6il    | 2   |     |     |    |   |    |         |      |    |   |     |     |          |         |        |     | Truong and Boeke. Cell 2017 |
|                                                                             | phe2AE    | 2   |     |     |    |   |    |         |      |    |   |     |     |          |         |        |     | Truong and Boeke. Cell 2017 |
|                                                                             | phe2AF    |     |     |     |    |   |    |         |      |    |   |     |     |          |         |        |     | Truong and Boeke. Cell 2017 |
|                                                                             | phe2AH    | 2   |     | 1.7 |    |   |    |         |      |    |   |     |     |          |         |        |     | Truong and Boeke. Cell 2017 |
|                                                                             | phe2BC    | 2   |     |     |    |   |    |         |      | 1  |   |     |     |          |         |        | 1.5 | Truong and Boeke. Cell 2017 |
|                                                                             | phe2BD    | 1.8 |     |     |    |   |    |         |      |    |   |     |     |          |         |        | 1.5 | Truong and Boeke. Cell 2017 |
|                                                                             | phe23C    | 1.5 |     |     |    |   |    |         |      |    |   |     |     |          |         |        |     | Truong and Boeke. Cell 2017 |
| yHs3                                                                        | yHs3-pool |     | 1.5 |     |    |   |    |         |      |    |   |     | 2   |          |         |        |     | Truong and Boeke. Cell 2017 |
|                                                                             | yHs3C5    | 2   |     |     |    |   |    |         |      |    |   |     |     |          |         |        |     | Truong and Boeke. Cell 2017 |
|                                                                             | yHs3-evo  | 1   | 1   | 1   |    |   |    |         |      | 1  | 1 |     |     |          |         |        | 1.5 | Truong and Boeke. Cell 2017 |
| yHs4                                                                        | yHs4-pool |     |     |     |    |   |    |         |      |    |   |     | 2   |          |         |        |     | Truong and Boeke. Cell 2017 |
|                                                                             | yHs4C5    | 1   |     | 1   |    |   |    |         |      |    |   |     |     |          |         |        | 1.5 | Truong and Boeke. Cell 2017 |
|                                                                             | yHs4-evo  |     |     |     |    |   |    |         |      |    |   |     |     |          |         |        |     | Truong and Boeke. Cell 2017 |
| yHs5                                                                        | yHs5-pool | 1   | 1   | 1   |    | 1 |    |         |      | 1  |   |     | 1   |          |         |        | 2   | Truong and Boeke. Cell 2017 |
|                                                                             | yHs5C5    | 1   | 1   | 1   |    | 1 |    |         |      | 1  |   |     | 1   |          |         |        | 1.5 | Truong and Boeke. Cell 2017 |
|                                                                             | yHs5C10   | 1   | 1   | 1   |    | 1 |    |         |      | 1  |   |     | 1   |          |         |        | 1.5 | Truong and Boeke. Cell 2017 |
|                                                                             | yHs5-evo  | 1   | 1   | 1   |    | 1 |    |         |      | 1  |   |     | 1   |          |         |        | 1.5 | Truong and Boeke. Cell 2017 |
| yHs6                                                                        | yHs6-pool |     | 1   |     |    |   |    |         |      |    |   |     | 2   |          |         |        |     | Truong and Boeke. Cell 2017 |
|                                                                             | 6C5       | 1   |     | 1   |    |   |    |         |      |    |   |     |     |          |         |        | 2   | Truong and Boeke. Cell 2017 |
|                                                                             | yHs6-evo  | 1   | 1   | 1   |    |   |    |         |      |    |   | 1   |     |          |         |        | 1.5 | Truong and Boeke. Cell 2017 |

|       |            |     |     |     |     |     |     |  |  |     |     |  |  |  |  |  |     |                             |
|-------|------------|-----|-----|-----|-----|-----|-----|--|--|-----|-----|--|--|--|--|--|-----|-----------------------------|
| yHs7  | yHs7-pool  |     | 1.5 |     |     |     |     |  |  |     | 1   |  |  |  |  |  |     | Truong and Boeke. Cell 2017 |
|       | yHs7C5     |     |     |     |     |     |     |  |  |     |     |  |  |  |  |  |     | Truong and Boeke. Cell 2017 |
|       | yHs7C10    |     |     |     |     |     |     |  |  |     |     |  |  |  |  |  |     | Truong and Boeke. Cell 2017 |
|       | yHs7-evo   |     |     |     |     |     |     |  |  |     |     |  |  |  |  |  |     | Truong and Boeke. Cell 2017 |
| yHs8  | yHs8       |     | 1   | 1   |     |     |     |  |  |     | 1   |  |  |  |  |  |     | Truong and Boeke. Cell 2017 |
| yHs9  | yHs9-pool  | 2   | 1   | 2   |     | 0.7 |     |  |  | 1   | 0.2 |  |  |  |  |  | 1   | This Study.                 |
|       | yHs9-evo5  | 1.2 |     | 2   | 0.2 |     |     |  |  | 1.7 | 0.2 |  |  |  |  |  | 1   | This Study.                 |
|       | yHs9e5C1   | 1   |     | 1   |     |     |     |  |  | 2   |     |  |  |  |  |  | 1   | This Study.                 |
|       | yHs9e5C2   | 1   |     | 1   |     |     |     |  |  | 1   |     |  |  |  |  |  |     | This Study.                 |
|       | yHs9e5C3   | 1   |     | 2   |     |     |     |  |  | 1.5 |     |  |  |  |  |  | 1   | This Study.                 |
| yHs10 | yHs10-pool | 2.5 |     | 1   |     | 0.5 | 1   |  |  | 0.7 |     |  |  |  |  |  | 2   | This Study.                 |
|       | yHs10-evo5 | 1   |     | 1   |     | 0.2 | 0.2 |  |  |     |     |  |  |  |  |  | 1.7 | This Study.                 |
| yHs11 | yHs11-pool | 2   | 0.5 | 1   |     |     | 0.2 |  |  |     |     |  |  |  |  |  | 2.2 | This Study.                 |
|       | yHs11-evo5 | 1.7 | 1   | 0.5 |     |     |     |  |  |     | 1   |  |  |  |  |  | 1   | This Study.                 |
|       | yHs11e5C2  | 2   | 1   | 1   |     | 0.5 |     |  |  | 1   | 1   |  |  |  |  |  | 1   | This Study.                 |
| yHs12 | yHs12-pool | 1.5 | 1   |     |     |     |     |  |  |     |     |  |  |  |  |  |     | This Study.                 |
|       | yHs12-evo5 | 0.7 | 1   |     |     |     |     |  |  |     |     |  |  |  |  |  |     | This Study.                 |
|       | yHs12e5C1  | 1   | 1   | 1   |     | 0.2 | 0.2 |  |  | 1   | 0.2 |  |  |  |  |  | 1   | This Study.                 |
| yHs13 | yHs13-pool |     |     | 0.2 |     |     |     |  |  |     |     |  |  |  |  |  | 1.7 | This Study.                 |
|       | yHs13-evo5 |     |     |     |     |     |     |  |  |     |     |  |  |  |  |  |     | This Study.                 |
| yHs14 | yHs14-pool | 2.2 | 0.5 | 1   |     |     | 0.2 |  |  | 0.2 |     |  |  |  |  |  |     | This Study.                 |
|       | yHs14-evo5 | 2   | 1   | 1   |     |     |     |  |  |     | 1   |  |  |  |  |  | 1   | This Study.                 |
|       | yHs14e5C1  | 2   | 1   | 1   |     |     |     |  |  | 1   | 1   |  |  |  |  |  | 1   | This Study.                 |
| yHs15 | yHs15-pool | 2   | 1   | 1   |     |     | 0.2 |  |  | 0.2 | 0.2 |  |  |  |  |  | 0.7 | This Study.                 |
|       | yHs15-evo5 | 2   | 1   | 1.7 |     |     |     |  |  |     | 1   |  |  |  |  |  | 1   | This Study.                 |
|       | yHs15e5C1  | 2   | 1   | 2   |     |     |     |  |  |     |     |  |  |  |  |  | 1   | This Study.                 |

|              |                     |          |          |     |  |  |  |  |          |  |     |  |  |  |  |          |                    |
|--------------|---------------------|----------|----------|-----|--|--|--|--|----------|--|-----|--|--|--|--|----------|--------------------|
|              | <i>yHs15e5C2</i>    | 2.5      | 1        | 1   |  |  |  |  |          |  | 1   |  |  |  |  | 1        | <i>This Study.</i> |
|              | <i>yHs15e5C3</i>    | 2        | 1        | 1.5 |  |  |  |  |          |  | 1   |  |  |  |  | 1.5      | <i>This Study.</i> |
| <i>yHs16</i> | <i>yHs16-_pool</i>  | 1.7<br>5 | 0.7<br>5 |     |  |  |  |  | 0.2<br>5 |  | 0.5 |  |  |  |  | 1        | <i>This Study.</i> |
|              | <i>yHs16-evo5C1</i> | 2        |          |     |  |  |  |  | 0.2<br>5 |  |     |  |  |  |  | 1.7<br>5 | <i>This Study.</i> |
|              | <i>yHs16-evo5C2</i> | 1.7<br>5 | 1.5      |     |  |  |  |  |          |  | 1   |  |  |  |  | 1.2<br>5 | <i>This Study.</i> |
|              | <i>yHs16-evo5C3</i> | 2        | 0.7<br>5 | 1   |  |  |  |  | 0.2<br>5 |  |     |  |  |  |  | 0.7<br>5 | <i>This Study.</i> |







|          |                                                             |       |                                                                                                                                                                                                                       |        |      |            |
|----------|-------------------------------------------------------------|-------|-----------------------------------------------------------------------------------------------------------------------------------------------------------------------------------------------------------------------|--------|------|------------|
| yMAH801  | NDC80-E568A diploid wild type histone shuffle strain        | a / α | his3Δ200/his3Δ200 leu2Δ0/leu2Δ0 lys2Δ0/lys2Δ0 trp1Δ63/trp1Δ63 ura3Δ0/ura3Δ0 met15Δ0/met15Δ0 hta2-htb2Δ0/hta2-htb2Δ0 hta1-htb1Δ0/hta1-htb1Δ0 hht1-hhf1Δ0/hht1-hhf1Δ0 hht2-hhf2Δ0/hht2-hhf2Δ0 NDC80(E568A)/NDC80(E568A) | pDT139 | URA3 | This study |
| yMAH810  | dad4-N61K diploid wild type histone shuffle strain          | a / α | his3Δ200/his3Δ200 leu2Δ0/leu2Δ0 lys2Δ0/lys2Δ0 trp1Δ63/trp1Δ63 ura3Δ0/ura3Δ0 met15Δ0/met15Δ0 hta2-htb2Δ0/hta2-htb2Δ0 hta1-htb1Δ0/hta1-htb1Δ0 hht1-hhf1Δ0/hht1-hhf1Δ0 hht2-hhf2Δ0/hht2-hhf2Δ0 dad4(N61K)/dad4(N61K)     | pDT139 | URA3 | This study |
| yMAH889  | DAD1-E50D diploid wild type histone shuffle strain          | a / α | his3Δ200/his3Δ200 leu2Δ0/leu2Δ0 lys2Δ0/lys2Δ0 trp1Δ63/trp1Δ63 ura3Δ0/ura3Δ0 met15Δ0/met15Δ0 hta2-htb2Δ0/hta2-htb2Δ0 hta1-htb1Δ0/hta1-htb1Δ0 hht1-hhf1Δ0/hht1-hhf1Δ0 hht2-hhf2Δ0/hht2-hhf2Δ0 DAD1(E50D)/DAD1(E50D)     | pDT139 | URA3 | This study |
| yMAH1122 | DAM1-N80Y diploid wild type histone shuffle strain          | a / α | his3Δ200/his3Δ200 leu2Δ0/leu2Δ0 lys2Δ0/lys2Δ0 trp1Δ63/trp1Δ63 ura3Δ0/ura3Δ0 met15Δ0/met15Δ0 hta2-htb2Δ0/hta2-htb2Δ0 hta1-htb1Δ0/hta1-htb1Δ0 hht1-hhf1Δ0/hht1-hhf1Δ0 hht2-hhf2Δ0/hht2-hhf2Δ0 DAM1(N80Y)/DAM1(N80Y)     | pDT139 | URA3 | This study |
| yMAH804  | SPC34-L63Q het. diploid wild type histone shuffle strain    | a / α | his3Δ200/his3Δ200 leu2Δ0/leu2Δ0 lys2Δ0/lys2Δ0 trp1Δ63/trp1Δ63 ura3Δ0/ura3Δ0 met15Δ0/met15Δ0 hta2-htb2Δ0/hta2-htb2Δ0 hta1-htb1Δ0/hta1-htb1Δ0 hht1-hhf1Δ0/hht1-hhf1Δ0 hht2-hhf2Δ0/hht2-hhf2Δ0 SPC34/ SPC34(L63Q)        | pDT139 | URA3 | This study |
| yMAH802  | SPC105-R583S het. diploid wild type histone shuffle strain  | a / α | his3Δ200/his3Δ200 leu2Δ0/leu2Δ0 lys2Δ0/lys2Δ0 trp1Δ63/trp1Δ63 ura3Δ0/ura3Δ0 met15Δ0/met15Δ0 hta2-htb2Δ0/hta2-htb2Δ0 hta1-htb1Δ0/hta1-htb1Δ0 hht1-hhf1Δ0/hht1-hhf1Δ0 hht2-hhf2Δ0/hht2-hhf2Δ0 SPC105/SPC105(R583S)      | pDT139 | URA3 | This study |
| yMAH814  | NDC80-E568A het. diploid wild type histone shuffle strain   | a / α | his3Δ200/his3Δ200 leu2Δ0/leu2Δ0 lys2Δ0/lys2Δ0 trp1Δ63/trp1Δ63 ura3Δ0/ura3Δ0 met15Δ0/met15Δ0 hta2-htb2Δ0/hta2-htb2Δ0 hta1-htb1Δ0/hta1-htb1Δ0 hht1-hhf1Δ0/hht1-hhf1Δ0 hht2-hhf2Δ0/hht2-hhf2Δ0 NDC80/NDC80(E568A)        | pDT139 | URA3 | This study |
| yMAH803  | dad4-N61K het. diploid wild type histone shuffle strain     | a / α | his3Δ200/his3Δ200 leu2Δ0/leu2Δ0 lys2Δ0/lys2Δ0 trp1Δ63/trp1Δ63 ura3Δ0/ura3Δ0 met15Δ0/met15Δ0 hta2-htb2Δ0/hta2-htb2Δ0 hta1-htb1Δ0/hta1-htb1Δ0 hht1-hhf1Δ0/hht1-hhf1Δ0 hht2-hhf2Δ0/hht2-hhf2Δ0 DAD4/dad4(N61K)           | pDT139 | URA3 | This study |
| yMAH805  | DAD1-E50D het. diploid wild type histone shuffle strain     | a / α | his3Δ200/his3Δ200 leu2Δ0/leu2Δ0 lys2Δ0/lys2Δ0 trp1Δ63/trp1Δ63 ura3Δ0/ura3Δ0 met15Δ0/met15Δ0 hta2-htb2Δ0/hta2-htb2Δ0 hta1-htb1Δ0/hta1-htb1Δ0 hht1-hhf1Δ0/hht1-hhf1Δ0 hht2-hhf2Δ0/hht2-hhf2Δ0 DAD1/DAD1(E50D)           | pDT139 | URA3 | This study |
| yMAH813  | DAM1-N80Y het. diploid wild type histone shuffle strain     | a / α | his3Δ200/his3Δ200 leu2Δ0/leu2Δ0 lys2Δ0/lys2Δ0 trp1Δ63/trp1Δ63 ura3Δ0/ura3Δ0 met15Δ0/met15Δ0 hta2-htb2Δ0/hta2-htb2Δ0 hta1-htb1Δ0/hta1-htb1Δ0 hht1-hhf1Δ0/hht1-hhf1Δ0 hht2-hhf2Δ0/hht2-hhf2Δ0 DAM1/DAM1(N80Y)           | pDT139 | URA3 | This study |
| yMAH1037 | scc4-D65Y histone shuffle strain                            | α     | his3Δ200 leu2Δ0 lys2Δ0 trp1Δ63 ura3Δ0 met15Δ0 hta2-htb2Δ0 hta1-htb1Δ0 hht1-hhf1Δ0 hht2-hhf2Δ0 scc4(D65Y)                                                                                                              | pDT139 | URA3 | This study |
| yMAH1043 | scc4-D65Y & DAM1-N80Y histone shuffle strain                | α     | his3Δ200 leu2Δ0 lys2Δ0 trp1Δ63 ura3Δ0 met15Δ0 hta2-htb2Δ0 hta1-htb1Δ0 hht1-hhf1Δ0 hht2-hhf2Δ0 scc4(D65Y) DAM1(N80Y)                                                                                                   | pDT139 | URA3 | This study |
| yMAH1047 | scc4-D65Y & DAD1-E50D histone shuffle strain                | α     | his3Δ200 leu2Δ0 lys2Δ0 trp1Δ63 ura3Δ0 met15Δ0 hta2-htb2Δ0 hta1-htb1Δ0 hht1-hhf1Δ0 hht2-hhf2Δ0 scc4(D65Y) DAD1(E50D)                                                                                                   | pDT139 | URA3 | This study |
| yMAH1331 | wild type histone shuffle strain Nuf2-RFP and Spc110-GFP    | α     | his3Δ200 leu2Δ0 lys2Δ0 trp1Δ63 ura3Δ0 met15Δ0 hta2-htb2Δ0 hta1-htb1Δ0 hht1-hhf1Δ0 hht2-hhf2Δ0 NUF2::ymScarlet SPC110::mNeonGreen                                                                                      | pDT139 | URA3 | This study |
| yMAH1337 | scc4-D65Y histone shuffle strain Nuf2-RFP and Spc110-GFP    | α     | his3Δ200 leu2Δ0 lys2Δ0 trp1Δ63 ura3Δ0 met15Δ0 hta2-htb2Δ0 hta1-htb1Δ0 hht1-hhf1Δ0 hht2-hhf2Δ0 NUF2::ymScarlet SPC110::mNeonGreen scc4(D65Y)                                                                           | pDT139 | URA3 | This study |
| yMAH1224 | DAD1-E50D histone shuffle strain Nuf2-RFP and Spc110-GFP    | α     | his3Δ200 leu2Δ0 lys2Δ0 trp1Δ63 ura3Δ0 met15Δ0 hta2-htb2Δ0 hta1-htb1Δ0 hht1-hhf1Δ0 hht2-hhf2Δ0 NUF2::ymScarlet SPC110::mNeonGreen DAD1(E50D)                                                                           | pDT139 | URA3 | This study |
| yMAH1233 | SPC105-R583S histone shuffle strain Nuf2-RFP and Spc110-GFP | α     | his3Δ200 leu2Δ0 lys2Δ0 trp1Δ63 ura3Δ0 met15Δ0 hta2-htb2Δ0 hta1-htb1Δ0 hht1-hhf1Δ0 hht2-hhf2Δ0 NUF2::ymScarlet SPC110::mNeonGreen SPC105(R583S)                                                                        | pDT139 | URA3 | This study |
| yGOL023  | mad3 deletion strain                                        | a     | leu2Δ0 met15Δ0 ura3Δ0 his3Δ1 mad3Δ0                                                                                                                                                                                   |        |      | This study |
| yGOL024  | mad3 deletion strain                                        | a     | leu2Δ0 met15Δ0 ura3Δ0 his3Δ1 mad3Δ0                                                                                                                                                                                   |        |      | This study |
| yGOL027  | ipl1-2 ts mutant strain                                     | a     | leu2Δ0 met15Δ0 ura3Δ0 his3Δ1 ipl1-2(H352Y)                                                                                                                                                                            |        |      | This study |
| yGOL028  | ipl1-2 ts mutant strain                                     | a     | leu2Δ0 met15Δ0 ura3Δ0 his3Δ1 ipl1-2(H352Y)                                                                                                                                                                            |        |      | This study |

|         |                                                                  |   |                                                                                                                 |        |      |            |
|---------|------------------------------------------------------------------|---|-----------------------------------------------------------------------------------------------------------------|--------|------|------------|
| yGOL029 | <i>mad3</i> deletion strain with <i>dad-1E50D</i> mutation       | a | <i>leu2Δ0 met15Δ0 ura3Δ0 his3Δ1 DAD1(E50D) mad3Δ0</i>                                                           |        |      | This study |
| yGOL030 | <i>mad3</i> deletion strain with <i>DAD1-E50D</i> mutation       | a | <i>leu2Δ0 met15Δ0 ura3Δ0 his3Δ1 DAD1(E50D) mad3Δ0</i>                                                           |        |      | This study |
| yGOL033 | <i>ipl1-2 ts</i> mutant strain with <i>DAD1-E50D</i> mutation    | a | <i>leu2Δ0 met15Δ0 ura3Δ0 his3Δ1 DAD1(E50D) ipl1-2(H352Y)</i>                                                    |        |      | This study |
| yGOL034 | <i>ipl1-2 ts</i> mutant strain with <i>DAD1-E50D</i> mutation    | a | <i>leu2Δ0 met15Δ0 ura3Δ0 his3Δ1 DAD1(E50D) ipl1-2(H352Y)</i>                                                    |        |      | This study |
| yGOL039 | <i>ipl1-2 ts</i> mutant strain with <i>NDC80-E568A</i> mutation  | a | <i>leu2Δ0 met15Δ0 ura3Δ0 his3Δ1 NDC80-E568A ipl1-2(H352Y)</i>                                                   |        |      | This study |
| yGOL040 | <i>ipl1-2 ts</i> mutant strain with <i>NDC80-E568A</i> mutation  | a | <i>leu2Δ0 met15Δ0 ura3Δ0 his3Δ1 NDC80-E568A ipl1-2(H352Y)</i>                                                   |        |      | This study |
| yGOL045 | <i>ipl1-2 ts</i> mutant strain with <i>SPC105-R583S</i> mutation | a | <i>leu2Δ0 met15Δ0 ura3Δ0 his3Δ1 SPC105-R583S ipl1-2(H352Y)</i>                                                  |        |      | This study |
| yGOL046 | <i>ipl1-2 ts</i> mutant strain with <i>SPC105-R583S</i> mutation | a | <i>leu2Δ0 met15Δ0 ura3Δ0 his3Δ1 SPC105-R583S ipl1-2(H352Y)</i>                                                  |        |      | This study |
| yGOL051 | <i>ipl1-2 ts</i> mutant strain with <i>SPC34-L63Q</i> mutation   | a | <i>leu2Δ0 met15Δ0 ura3Δ0 his3Δ1 SPC34-L63Q ipl1-2(H352Y)</i>                                                    |        |      | This study |
| yGOL052 | <i>ipl1-2 ts</i> mutant strain with <i>SPC34-L63Q</i> mutation   | a | <i>leu2Δ0 met15Δ0 ura3Δ0 his3Δ1 SPC34-L63Q ipl1-2(H352Y)</i>                                                    |        |      | This study |
| yGOL057 | <i>ipl1-2 ts</i> mutant strain with <i>DAM1-N80Y</i> mutation    | a | <i>leu2Δ0 met15Δ0 ura3Δ0 his3Δ1 DAM1-N80Y ipl1-2(H352Y)</i>                                                     |        |      | This study |
| yGOL058 | <i>ipl1-2 ts</i> mutant strain with <i>DAM1-N80Y</i> mutation    | a | <i>leu2Δ0 met15Δ0 ura3Δ0 his3Δ1 DAM1-N80Y ipl1-2(H352Y)</i>                                                     |        |      | This study |
| yGOL015 | <i>mad3</i> deletion shuffle strain                              | α | <i>his3Δ200 leu2Δ0 lys2Δ0 trp1Δ63 ura3Δ0 met15Δ0 hta2-htb2Δ0 hta1-htb1Δ0 hht1-hhf1Δ0 hht2-hhf2Δ0 mad3Δ</i>      | pDT139 | URA3 | This study |
| yGOL016 | <i>mad3</i> deletion shuffle strain                              | α | <i>his3Δ200 leu2Δ0 lys2Δ0 trp1Δ63 ura3Δ0 met15Δ0 hta2-htb2Δ0 hta1-htb1Δ0 hht1-hhf1Δ0 hht2-hhf2Δ0 mad3Δ</i>      | pDT139 | URA3 | This study |
| yMAH955 | <i>DAM1</i> residue 80 mutant shuffle strain <i>DAM1-N80C</i>    | α | <i>his3Δ200 leu2Δ0 lys2Δ0 trp1Δ63 ura3Δ0 met15Δ0 hta2-htb2Δ0 hta1-htb1Δ0 hht1-hhf1Δ0 hht2-hhf2Δ0 DAM1(N80C)</i> | pDT139 | URA3 | This study |
| yMAH958 | <i>DAM1</i> residue 80 mutant shuffle strain <i>DAM1-N80G</i>    | α | <i>his3Δ200 leu2Δ0 lys2Δ0 trp1Δ63 ura3Δ0 met15Δ0 hta2-htb2Δ0 hta1-htb1Δ0 hht1-hhf1Δ0 hht2-hhf2Δ0 DAM1(N80G)</i> | pDT139 | URA3 | This study |
| yMAH961 | <i>DAM1</i> residue 80 mutant shuffle strain <i>DAM1-N80I</i>    | α | <i>his3Δ200 leu2Δ0 lys2Δ0 trp1Δ63 ura3Δ0 met15Δ0 hta2-htb2Δ0 hta1-htb1Δ0 hht1-hhf1Δ0 hht2-hhf2Δ0 DAM1(N80I)</i> | pDT139 | URA3 | This study |
| yMAH964 | <i>DAM1</i> residue 80 mutant shuffle strain <i>DAM1-N80M</i>    | α | <i>his3Δ200 leu2Δ0 lys2Δ0 trp1Δ63 ura3Δ0 met15Δ0 hta2-htb2Δ0 hta1-htb1Δ0 hht1-hhf1Δ0 hht2-hhf2Δ0 DAM1(N80M)</i> | pDT139 | URA3 | This study |
| yMAH967 | <i>DAM1</i> residue 80 mutant shuffle strain <i>DAM1-N80R</i>    | α | <i>his3Δ200 leu2Δ0 lys2Δ0 trp1Δ63 ura3Δ0 met15Δ0 hta2-htb2Δ0 hta1-htb1Δ0 hht1-hhf1Δ0 hht2-hhf2Δ0 DAM1(N80R)</i> | pDT139 | URA3 | This study |
| yMAH969 | <i>DAM1</i> residue 80 mutant shuffle strain <i>DAM1-N80D</i>    | α | <i>his3Δ200 leu2Δ0 lys2Δ0 trp1Δ63 ura3Δ0 met15Δ0 hta2-htb2Δ0 hta1-htb1Δ0 hht1-hhf1Δ0 hht2-hhf2Δ0 DAM1(N80D)</i> | pDT139 | URA3 | This study |
| yMAH971 | <i>DAM1</i> residue 80 mutant shuffle strain <i>DAM1-N80S</i>    | α | <i>his3Δ200 leu2Δ0 lys2Δ0 trp1Δ63 ura3Δ0 met15Δ0 hta2-htb2Δ0 hta1-htb1Δ0 hht1-hhf1Δ0 hht2-hhf2Δ0 DAM1(N80S)</i> | pDT139 | URA3 | This study |
| yMAH972 | <i>DAM1</i> residue 80 mutant shuffle strain <i>DAM1-N80A</i>    | α | <i>his3Δ200 leu2Δ0 lys2Δ0 trp1Δ63 ura3Δ0 met15Δ0 hta2-htb2Δ0 hta1-htb1Δ0 hht1-hhf1Δ0 hht2-hhf2Δ0 DAM1(N80A)</i> | pDT139 | URA3 | This study |
| yMAH973 | <i>DAM1</i> residue 80 mutant shuffle strain <i>DAM1-N80V</i>    | α | <i>his3Δ200 leu2Δ0 lys2Δ0 trp1Δ63 ura3Δ0 met15Δ0 hta2-htb2Δ0 hta1-htb1Δ0 hht1-hhf1Δ0 hht2-hhf2Δ0 DAM1(N80V)</i> | pDT139 | URA3 | This study |
| yMAH975 | <i>DAM1</i> residue 80 mutant shuffle strain <i>DAM1-N80L</i>    | α | <i>his3Δ200 leu2Δ0 lys2Δ0 trp1Δ63 ura3Δ0 met15Δ0 hta2-htb2Δ0 hta1-htb1Δ0 hht1-hhf1Δ0 hht2-hhf2Δ0 DAM1(N80L)</i> | pDT139 | URA3 | This study |
| yMAH976 | <i>DAM1</i> residue 80 mutant shuffle strain <i>DAM1-N80W</i>    | α | <i>his3Δ200 leu2Δ0 lys2Δ0 trp1Δ63 ura3Δ0 met15Δ0 hta2-htb2Δ0 hta1-htb1Δ0 hht1-hhf1Δ0 hht2-hhf2Δ0 DAM1(N80W)</i> | pDT139 | URA3 | This study |
| yMAH978 | <i>DAM1</i> residue 80 mutant shuffle strain <i>DAM1-N80H</i>    | α | <i>his3Δ200 leu2Δ0 lys2Δ0 trp1Δ63 ura3Δ0 met15Δ0 hta2-htb2Δ0 hta1-htb1Δ0 hht1-hhf1Δ0 hht2-hhf2Δ0 DAM1(N80H)</i> | pDT139 | URA3 | This study |
| yMAH980 | <i>DAM1</i> residue 80 mutant shuffle strain <i>DAM1-N80F</i>    | α | <i>his3Δ200 leu2Δ0 lys2Δ0 trp1Δ63 ura3Δ0 met15Δ0 hta2-htb2Δ0 hta1-htb1Δ0 hht1-hhf1Δ0 hht2-hhf2Δ0 DAM1(N80F)</i> | pDT139 | URA3 | This study |

|          |                                                                                                                                                                                                                   |              |                                                                                                                                                                                                               |        |      |                      |
|----------|-------------------------------------------------------------------------------------------------------------------------------------------------------------------------------------------------------------------|--------------|---------------------------------------------------------------------------------------------------------------------------------------------------------------------------------------------------------------|--------|------|----------------------|
| yMAH987  | DAM1 residue 80 mutant shuffle strain DAM1-N80E                                                                                                                                                                   | $\alpha$     | his3 $\Delta$ 200 leu2 $\Delta$ 0 lys2 $\Delta$ 0 trp1 $\Delta$ 63 ura3 $\Delta$ 0 met15 $\Delta$ 0 hta2-htb2 $\Delta$ 0 hta1-htb1 $\Delta$ 0 hht1-hhf1 $\Delta$ 0 hht2-hhf2 $\Delta$ 0 DAM1(N80E)            | pDT139 | URA3 | This study           |
| yMAH995  | DAM1 residue 80 mutant shuffle strain DAM1-N80T                                                                                                                                                                   | $\alpha$     | his3 $\Delta$ 200 leu2 $\Delta$ 0 lys2 $\Delta$ 0 trp1 $\Delta$ 63 ura3 $\Delta$ 0 met15 $\Delta$ 0 hta2-htb2 $\Delta$ 0 hta1-htb1 $\Delta$ 0 hht1-hhf1 $\Delta$ 0 hht2-hhf2 $\Delta$ 0 DAM1(N80T)            | pDT139 | URA3 | This study           |
| yMAH998  | DAM1 residue 80 mutant shuffle strain DAM1-N80Q                                                                                                                                                                   | $\alpha$     | his3 $\Delta$ 200 leu2 $\Delta$ 0 lys2 $\Delta$ 0 trp1 $\Delta$ 63 ura3 $\Delta$ 0 met15 $\Delta$ 0 hta2-htb2 $\Delta$ 0 hta1-htb1 $\Delta$ 0 hht1-hhf1 $\Delta$ 0 hht2-hhf2 $\Delta$ 0 DAM1(N80Q)            | pDT139 | URA3 | This study           |
| yMAH1248 | DAD1-E50D DAM1-N80Q histone shuffle strain                                                                                                                                                                        | $\alpha$     | his3 $\Delta$ 200 leu2 $\Delta$ 0 lys2 $\Delta$ 0 trp1 $\Delta$ 63 ura3 $\Delta$ 0 met15 $\Delta$ 0 hta2-htb2 $\Delta$ 0 hta1-htb1 $\Delta$ 0 hht1-hhf1 $\Delta$ 0 hht2-hhf2 $\Delta$ 0 DAD1(E50D) DAM1(N80Q) | pDT139 | URA3 | This study           |
| yMAH1063 | DAD1-E50A histone shuffle strain                                                                                                                                                                                  | $\alpha$     | his3 $\Delta$ 200 leu2 $\Delta$ 0 lys2 $\Delta$ 0 trp1 $\Delta$ 63 ura3 $\Delta$ 0 met15 $\Delta$ 0 hta2-htb2 $\Delta$ 0 hta1-htb1 $\Delta$ 0 hht1-hhf1 $\Delta$ 0 hht2-hhf2 $\Delta$ 0 DAD1(E50A)            | pDT139 | URA3 | This study           |
| yMAH1074 | DAD1-E50A DAM1-N80Y histone shuffle strain                                                                                                                                                                        | $\alpha$     | his3 $\Delta$ 200 leu2 $\Delta$ 0 lys2 $\Delta$ 0 trp1 $\Delta$ 63 ura3 $\Delta$ 0 met15 $\Delta$ 0 hta2-htb2 $\Delta$ 0 hta1-htb1 $\Delta$ 0 hht1-hhf1 $\Delta$ 0 hht2-hhf2 $\Delta$ 0 DAD1(E50A) DAM1(N80Y) | pDT139 | URA3 | This study           |
| yJL332   | SK1 WT diploid                                                                                                                                                                                                    | $a / \alpha$ | ho::LYS2/ho::LYS2, lys2/lys2, ura3/ura3, leu2::hisG/leu2::hisG, his3::hisG/his3::hisG, trp1::hisG/his3::hisG                                                                                                  |        |      | Luo et al.           |
| yMAH1323 | SK1 DAD1-E50D/WT het. diploid                                                                                                                                                                                     | $a / \alpha$ | ho::LYS2/ho::LYS2, lys2/lys2, ura3/ura3, leu2::hisG/leu2::hisG, his3::hisG/his3::hisG, trp1::hisG/his3::hisG, DAD1/DAD1(E50D)                                                                                 |        |      | This study           |
| yMAH1356 | SK1 DAD1-E50D/DAD1-E50D hom. diploid                                                                                                                                                                              | $a / \alpha$ | ho::LYS2/ho::LYS2, lys2/lys2, ura3/ura3, leu2::hisG/leu2::hisG, his3::hisG/his3::hisG, trp1::hisG/his3::hisG, DAD1(E50D)/DAD1(E50D)                                                                           |        |      | This study           |
| yDT67    | wild type histone shuffle strain                                                                                                                                                                                  | $\alpha$     | his3 $\Delta$ 200 leu2 $\Delta$ 0 lys2 $\Delta$ 0 trp1 $\Delta$ 63 ura3 $\Delta$ 0 met15 $\Delta$ 0 hta2-htb2 $\Delta$ 0 hta1-htb1 $\Delta$ 0 hht1-hhf1 $\Delta$ 0 hht2-hhf2 $\Delta$ 0                       | pDT105 | TRP1 | Truong and Boeke.    |
| yDT180   | DAD1(E50D) hH3.1-core histone humanized                                                                                                                                                                           | $\alpha$     | his3 $\Delta$ 200 leu2 $\Delta$ 0 lys2 $\Delta$ 0 trp1 $\Delta$ 63 ura3 $\Delta$ 0 met15 $\Delta$ 0 hta2-htb2 $\Delta$ 0 hta1-htb1 $\Delta$ 0 hht1-hhf1 $\Delta$ 0 hht2-hhf2 $\Delta$ 0 DAD1(E50D)            | pDT109 | TRP1 | Truong and Boeke.    |
| BY4742   | Wildtype MAT $\alpha$                                                                                                                                                                                             | $\alpha$     | MAT $\alpha$ his3 $\Delta$ 1 leu2 $\Delta$ 0 lys2 $\Delta$ 0 ura3 $\Delta$ 0                                                                                                                                  |        |      | Brachmann CB, et al. |
| Notes    |                                                                                                                                                                                                                   |              |                                                                                                                                                                                                               |        |      |                      |
|          | Haase et al.; <a href="https://doi.org/10.1534/g3.119.400325">https://doi.org/10.1534/g3.119.400325</a>                                                                                                           |              |                                                                                                                                                                                                               |        |      |                      |
|          | Luo et al.; <a href="https://doi.org/10.1038/s41586-018-0374-x">https://doi.org/10.1038/s41586-018-0374-x</a>                                                                                                     |              |                                                                                                                                                                                                               |        |      |                      |
|          | Truong and Boeke.; <a href="https://doi.org/10.1016/j.cell.2017.10.043">https://doi.org/10.1016/j.cell.2017.10.043</a>                                                                                            |              |                                                                                                                                                                                                               |        |      |                      |
|          | Brachmann CB, et al.; <a href="https://doi.org/10.1002/(SICI)1097-0061(19980130)14:2&lt;115::AID-YEA204&gt;3.0.CO;2-2">https://doi.org/10.1002/(SICI)1097-0061(19980130)14:2&lt;115::AID-YEA204&gt;3.0.CO;2-2</a> |              |                                                                                                                                                                                                               |        |      |                      |
|          | *Detailed genotypes can be found in Supplemental table 2                                                                                                                                                          |              |                                                                                                                                                                                                               |        |      |                      |

| <b>Appendix Table S4. Plasmids used in this study.</b> |             |                |                                                                                                        |                        |
|--------------------------------------------------------|-------------|----------------|--------------------------------------------------------------------------------------------------------|------------------------|
| <b>Plasmid</b>                                         | <b>Name</b> | <b>markers</b> | <b>Description</b>                                                                                     | <b>Source</b>          |
| yeast histone plasmid                                  | pDT139      | KAN URA3       | Superloser plasmid with four core histone genes (HTA2-HTB2-HHT1-HHF1)                                  | Haase et al. 2019      |
| human histone plasmid                                  | pDT109      | AMP / TRP1     | pRS414 with human core histones (H3.1 H4 H2A H2B) with HHT2F2HTA1B1 PROs/TERs                          | Truong and Boeke. 2017 |
| LEU2 guide RNA expression vector                       | pNA525      | AMP / LEU2     | p425-SNR52p-NotI(gRNA)-SUP4t - NotI site for inserting any gRNA using Gibson Assembly.                 | DiCarlo et al. 2013    |
| Cas9 vector                                            | pNA0519     | AMP / HIS      | pRS413-TEF1p-Cas9-CYC1t - Cas9 fragment cloned into pRS413                                             | DiCarlo et al. 2013    |
| DAM1 guide RNA plasmid                                 | pMAH298     | AMP / LEU2     | guide RNA targeting the Dam1 locus at codon 88                                                         | this study             |
| SPC34 guide RNA plasmid                                | pMAH300     | AMP / LEU2     | guide RNA targeting the Spc34 locus at codon 59                                                        | this study             |
| SPC105 guide RNA plasmid                               | pMAH301     | AMP / LEU2     | guide RNA targeting the Spc105 locus at codon 583                                                      | this study             |
| DAD4 guide RNA plasmid                                 | pMAH302     | AMP / LEU2     | guide RNA targeting the Dad4 locus at codon 62                                                         | this study             |
| NDC80 guide RNA plasmid                                | pMAH299     | AMP / LEU2     | guide RNA targeting the Ndc80 locus at codon 618                                                       | this study             |
| DAD1 guide RNA plasmid                                 | pMAH604     | AMP / LEU2     | guide RNA targeting the Dad1 locus at codon 49                                                         | this study             |
| SCC4 guide RNA plasmid                                 | pMAH606     | AMP / LEU2     | guide RNA targeting the Scc4 locus at codon 64                                                         | this study             |
| NUF2 guide RNA plasmid                                 | pMAH441     | AMP / LEU2     | guide RNA targeting the 3' end of the Nuf2 locus                                                       | this study             |
| SPC110 guide RNA plasmid                               | pMAH439     | AMP / LEU2     | guide RNA targeting the 3' end of the Spc110 locus                                                     | this study             |
| SPC110-mNeonGreen repair template                      | pMAH460     | AMP            | pUC19-Spc110-mNeonGreen targeting repair template.                                                     | this study             |
| NUF2-ymScarlet repair template                         | pMAH462     | AMP            | pUC19-NUF2-ymScarlet targeting repair template.                                                        | this study             |
| IPL1 guide RNA plasmid                                 | pMAH328     | AMP / LEU2     | guide RNA targeting the Ipl1 locus at codon 345                                                        | this study             |
| MAD3 guide RNA plasmid                                 | pMAH512     | AMP / LEU2     | guide RNA targeting the Mad3 locus at codon 285                                                        | this study             |
| Dam1 complex expression vector                         | pJT44       | AMP            | Two polycistrons containing Dad1, Duo1, Spc34-FLAG, Dam1, Hsk3 and Dad4, Dad3, Dad2, Spc19, Ask1       | Umbreit et al.2014     |
| Dam1 complex DAD1E50D expression vector                | pMAH359     | AMP            | Two polycistrons containing Dad1(E50D), Duo1, Spc34-FLAG, Dam1, Hsk3 and Dad4, Dad3, Dad2, Spc19, Ask1 | this study             |
| pRS416-DAD1-E50D                                       | pMAH490     | AMP / URA3     | pRS416 with Dad1(E50D) - with native promoter/terminator                                               | this study             |
| pRS416-DAD1                                            | pMAH492     | AMP / URA3     | pRS416 with Dad1 - with native promoter/terminator                                                     | this study             |

| <b>Appendix Table S5. DNA oligos used in this study.</b> |              |                                                                   |                                                                                           |                          |
|----------------------------------------------------------|--------------|-------------------------------------------------------------------|-------------------------------------------------------------------------------------------|--------------------------|
| <b>Name</b>                                              | <b>oligo</b> | <b>sequence 5' -&gt; 3'</b>                                       | <b>notes</b>                                                                              | <b>source</b>            |
| gRNA-DAM1                                                | oMH876       | <u>TGAAAGATAAATGATCTAAGATCAGCTAAACTCTCGGTTTTAGAGCTAGAAA</u>       | sgRNA Dam1; flanking homology for subcloning into NotI site on guide expression plasmid   | this study               |
| Dam1-N80Y-F                                              | oMH877       | CTGAGCGATTCAATCATTACTTTAGATTCTTATTTACGCGCTTAAATTTTATACAC<br>GAG   | Repair template Forward oligo                                                             | this study               |
| Dam1-N80Y-R                                              | oMH878       | ACAACAACGAACCTAGGGATTCAATTAAGATCAGCTAAACTCTCGTGATAAAAATTT<br>AAGC | Repair template Reverse oligo                                                             | this study               |
| gRNA-NDC80                                               | oMH881       | <u>TGAAAGATAAATGATCAACTAAAATTTTCAGATGCTGGTTTTAGAGCTAGAAA</u>      | sgRNA Ndc80; flanking homology for subcloning into NotI site on guide expression plasmid  | this study               |
| gRNA-SPC34                                               | oMH882       | <u>TGAAAGATAAATGATCAAAGGACTGTAACCCAGACGGTTTTAGAGCTAGAAA</u>       | sgRNA Spc34; flanking homology for subcloning into NotI site on guide expression plasmid  | this study               |
| gRNA-DAD4                                                | oMH905       | <u>TGAAAGATAAATGATCTAGTAGCGTCCAATTCAACCGTTTTAGAGCTAGAAA</u>       | sgRNA Dad4; flanking homology for subcloning into NotI site on guide expression plasmid   | this study               |
| gRNA-DAD1                                                | oMH1392      | <u>TGAAAGATAAATGATCGAATGGTCTCAATATATCATGTTTTAGAGCTAGAAA</u>       | sgRNA Dad1; flanking homology for subcloning into NotI site on guide expression plasmid   | this study               |
| gRNA-SPC105                                              | oMH893       | <u>TGAAAGATAAATGATCCAATGGAATGGTATGAATGGGTTTTAGAGCTAGAAA</u>       | sgRNA Spc105; flanking homology for subcloning into NotI site on guide expression plasmid | this study               |
| NDC80-E568A-F                                            | oMH879       | GCATGACATAAATGAGAAAACCTCAAATTAATGAAAACTTGCATTGG                   | Repair template Forward oligo                                                             | this study               |
| NDC80-E568A-R                                            | oMH880       | CTTCAAATTTTAGTTCCGTTGAAGTTACCAATTTTCAGCATCTGAA                    | Repair template Reverse oligo                                                             | this study               |
| SPC34-L63Q-F                                             | oMH883       | AGCATTAGAAAAGACATTACTAGACTAATAAAGGACTGTAACCACGACGAAGCGTA<br>TCTT  | Repair template Forward oligo                                                             | this study               |
| SPC34-L63Q-R                                             | oMH884       | TACGTGAAACGGATTGTTTCTCAGGGTTGACTTTGAAGTGAAGATACGCTTCGTCG<br>TGGT  | Repair template Reverse oligo                                                             | this study               |
| SPC105-R583S-F                                           | oMH894       | TGGTCAAAGGATATTCGAAATTGGAGGCAGCAATGGAATGGTATGAATGGAGCAA<br>AAAGC  | Repair template Forward oligo                                                             | this study               |
| SPC105-R583S-R                                           | oMH895       | TTCAAATTTTCTGCCAAAATTAATCCAGACCATTTAGTTGCTTTTTGCTCCATTCAT<br>AC   | Repair template Reverse oligo                                                             | this study               |
| DAD4-N61K-F                                              | oMH906       | ATCATGGGCGCAATTTGTGATAACTACCATAGTAGCGTCCAATTCAAGCTAGAAGC<br>GACC  | Repair template Forward oligo                                                             | this study               |
| DAD4-N61K-R                                              | oMH907       | ATAGAAAATTGGTGAATTAAAGAGGTGGCTTCTTGTATTGGTCGCTTCTAGCTTG<br>AATT   | Repair template Reverse oligo                                                             | this study               |
| DAD1-E50D-F                                              | oMH636       | AAATCAGAAACTGACTGGAATTTCTTCCACAGCTATCGAGCTATCTAATGATAT<br>ATTG    | Repair template Forward oligo                                                             | this study               |
| DAD1-E50D-R                                              | oMH637       | ATGAGACTATGAATCAATCTTGAATGGTCTGAATGGTCTCAATATATCATTAGATA<br>GCT   | Repair template Reverse oligo                                                             | this study               |
| gRNA-SCC4                                                | oMH1420      | <u>TGAAAGATAAATGATCATGTACGCTTTCAGTTCTGGGTTTTAGAGCTAGAAA</u>       | sgRNA Scc4; flanking homology for subcloning into NotI site on guide expression plasmid   | this study               |
| SCC4-D65Y-F                                              | oMH1418      | TATCCAGATGTTTCAGCTATTGAAAACGAAATGTACGCTTTCAGTTCTGGAGTATA<br>GTAA  | Repair template Forward oligo                                                             | this study               |
| SCC4-D65Y-R                                              | oMH1419      | CGTCTCCTGTATCAATAACTCCACCATCTCAAACGTGACCTTACTATACTCCAGAA<br>CTGA  | Repair template Reverse oligo                                                             | this study               |
| UBC6 F RT-PCR                                            | oMH1571      | ACAAGGGCGGTCAATATCACG                                             |                                                                                           | Ling and Yuen. PNAS 2019 |
| UBC6 R RT-PCR                                            | oMH1572      | TGGGCTTGAAACGTCCATTCCG                                            |                                                                                           | Ling and Yuen. PNAS 2019 |
| CLN2 F RT-PCR                                            | oMH1573      | ATGCTGCAAGAATACCACCAA                                             |                                                                                           | Ling and Yuen. PNAS 2019 |

|                |         |                                                                  |                                                                                                               |                          |
|----------------|---------|------------------------------------------------------------------|---------------------------------------------------------------------------------------------------------------|--------------------------|
| CLN2 R RT-PCR  | oMH1574 | TCATTTTCAGGCTGCTGGTCTA                                           |                                                                                                               | Ling and Yuen. PNAS 2019 |
| CEN16 F RT-PCR | oMH1577 | AAAGGTTGAAGCCGTTATGTTGTCCG                                       |                                                                                                               | Ling and Yuen. PNAS 2019 |
| CEN16 R RT-PCR | oMH1578 | TTAGCCGCTTTGCCGATTTTCGC                                          |                                                                                                               | Ling and Yuen. PNAS 2019 |
| CEN6 F RT-PCR  | oMH1579 | TTTTGTTTTCCGAAGATGTAAAATAGGTTG                                   |                                                                                                               | Ling and Yuen. PNAS 2019 |
| CEN6 R RT-PCR  | oMH1580 | GTTCTGCTTTCCCTCCCAAACAG                                          |                                                                                                               | Ling and Yuen. PNAS 2019 |
| CEN1 F RT-PCR  | oMH1581 | TGTAATGATTTAAGTCTTGTCACATGA                                      |                                                                                                               | Ling and Yuen. PNAS 2019 |
| CEN1 R RT-PCR  | oMH1582 | AAAATACTTTGACTGCTTCGGAA                                          |                                                                                                               | Ling and Yuen. PNAS 2019 |
| CEN7 F RT-PCR  | oMH1583 | TTCATGGAAATTTGCTTCTTGAGC                                         |                                                                                                               | Ling and Yuen. PNAS 2019 |
| CEN7 R RT-PCR  | oMH1584 | TCCAATACTTTGTCGTCAATATTCTTTC                                     |                                                                                                               | Ling and Yuen. PNAS 2019 |
| CEN3 F RT-PCR  | oMH1585 | GGAAAATCCACAGAAAGCTATTCA                                         |                                                                                                               | Ling and Yuen. PNAS 2019 |
| CEN3 R RT-PCR  | oMH1586 | CCACCAGTAAACGTTTCATATATCCA                                       |                                                                                                               | Ling and Yuen. PNAS 2019 |
| gRNA-NUF2-3'   | oMH1089 | <u>TGAAAGATAAATGATCTCGAATATATGCAATAGCAGGTTTTAGAGCTAGAAA</u>      | sgRNA Nuf2 (3' end, near stop); flanking homology for subcloning into NotI site on guide expression plasmid   | this study               |
| gRNA-SPC110-3' | oMH1098 | <u>TGAAAGATAAATGATCATAGAATTGAGAGTAGCAGCGTTTTAGAGCTAGAAA</u>      | sgRNA Spc110 (3' end, near stop); flanking homology for subcloning into NotI site on guide expression plasmid | this study               |
| gRNA-IPL1      | oMH718  | <u>TGAAAGATAAATGATCGATGCATTTTTACGTCTCCAGTTTTAGAGCTAGAAA</u>      | sgRNA Ipl1; flanking homology for subcloning into NotI site on guide expression plasmid                       | this study               |
| IPL1-H352Y-F   | oMH719  | TTAAACTACTAAAATACGACCCCAAAGATAGAATGCGTCTTGGAGACGTAAAAATG<br>TATC | Repair template Forward oligo                                                                                 | this study               |
| IPL1-H352Y-R   | oMH720  | CGCTTATTTCCCAAAGGGCTTGTCTTAGTATCCAAGGATACATTTTTACGTCT<br>CCA     | Repair template Reverse oligo                                                                                 | this study               |
| gRNA-MAD3      | oMH1315 | <u>TGAAAGATAAATGATCGAGGTGTTTATAGAGATGGCGTTTTAGAGCTAGAAA</u>      | sgRNA Mad3; flanking homology for subcloning into NotI site on guide expression plasmid                       | this study               |
| MAD3-Δ-F       | oMH1316 | ATAGTAAACAAAATCATGCGAAAATACAATAAAGACGTTAACTTGATAGAAATAAA<br>ACT  | Repair template Forward oligo                                                                                 | this study               |
| MAD3-Δ-R       | oMH1317 | TGTTTACGATTGGCCAGTATACTTACTCATTGATTGATTGTTTATTTCTATCAA<br>GTT    | Repair template Reverse oligo                                                                                 | this study               |
| Dam1-N80A-F    | oMH1343 | CTGAGCGATTCAATCATTACTTTAGATTCCGCTTTCACGCGCTTAAATTTTATACAC<br>GAG | Repair template Forward oligo; used with oMH878                                                               | this study               |
| Dam1-N80C-F    | oMH1344 | CTGAGCGATTCAATCATTACTTTAGATTCTGTTTCACGCGCTTAAATTTTATACAC<br>GAG  | Repair template Forward oligo; used with oMH878                                                               | this study               |
| Dam1-N80G-F    | oMH1345 | CTGAGCGATTCAATCATTACTTTAGATTCCGTTTCACGCGCTTAAATTTTATACAC<br>GAG  | Repair template Forward oligo; used with oMH878                                                               | this study               |



|                         |         |                                                                    |                                                 |                      |
|-------------------------|---------|--------------------------------------------------------------------|-------------------------------------------------|----------------------|
| Dam1-N80I-F             | oMH1346 | CTGAGCGATTCAATCATTACTTTAGATTCCATTTTCACGCGCTTAAATTTTATACAC<br>GAG   | Repair template Forward oligo; used with oMH878 | this study           |
| Dam1-N80P-F             | oMH1347 | CTGAGCGATTCAATCATTACTTTAGATTCCCCATTACGCGCTTAAATTTTATACAC<br>GAG    | Repair template Forward oligo; used with oMH878 | this study           |
| Dam1-N80S-F             | oMH1348 | CTGAGCGATTCAATCATTACTTTAGATTCTCTTTCACGCGCTTAAATTTTATACAC<br>GAG    | Repair template Forward oligo; used with oMH878 | this study           |
| Dam1-N80T-F             | oMH1349 | CTGAGCGATTCAATCATTACTTTAGATTCCACTTTCACGCGCTTAAATTTTATACAC<br>GAG   | Repair template Forward oligo; used with oMH878 | this study           |
| Dam1-N80V-F             | oMH1350 | CTGAGCGATTCAATCATTACTTTAGATTCCGTTTTTCACGCGCTTAAATTTTATACAC<br>GAG  | Repair template Forward oligo; used with oMH878 | this study           |
| Dam1-N80D-F             | oMH1351 | CTGAGCGATTCAATCATTACTTTAGATTCCGATTTTCACGCGCTTAAATTTTATACAC<br>GAG  | Repair template Forward oligo; used with oMH878 | this study           |
| Dam1-N80E-F             | oMH1352 | CTGAGCGATTCAATCATTACTTTAGATTCCGAATTCACGCGCTTAAATTTTATACAC<br>GAG   | Repair template Forward oligo; used with oMH878 | this study           |
| Dam1-N80K-F             | oMH1353 | CTGAGCGATTCAATCATTACTTTAGATTCCAAATTCACGCGCTTAAATTTTATACAC<br>GAG   | Repair template Forward oligo; used with oMH878 | this study           |
| Dam1-N80L-F             | oMH1354 | CTGAGCGATTCAATCATTACTTTAGATTCCCTTGTTTCACGCGCTTAAATTTTATACAC<br>GAG | Repair template Forward oligo; used with oMH878 | this study           |
| Dam1-N80M-F             | oMH1355 | CTGAGCGATTCAATCATTACTTTAGATTCCATGTTTCACGCGCTTAAATTTTATACAC<br>GAG  | Repair template Forward oligo; used with oMH878 | this study           |
| Dam1-N80Q-F             | oMH1356 | CTGAGCGATTCAATCATTACTTTAGATTCCCAATTCACGCGCTTAAATTTTATACAC<br>GAG   | Repair template Forward oligo; used with oMH878 | this study           |
| Dam1-N80R-F             | oMH1357 | CTGAGCGATTCAATCATTACTTTAGATTCCAGATTCACGCGCTTAAATTTTATACAC<br>GAG   | Repair template Forward oligo; used with oMH878 | this study           |
| Dam1-N80F-F             | oMH1358 | CTGAGCGATTCAATCATTACTTTAGATTCTTTTTTCACGCGCTTAAATTTTATACAC<br>GAG   | Repair template Forward oligo; used with oMH878 | this study           |
| Dam1-N80H-F             | oMH1359 | CTGAGCGATTCAATCATTACTTTAGATTCCCATTTTCACGCGCTTAAATTTTATACAC<br>GAG  | Repair template Forward oligo; used with oMH878 | this study           |
| Dam1-N80W-F             | oMH1360 | CTGAGCGATTCAATCATTACTTTAGATTCTGGTTTCACGCGCTTAAATTTTATACAC<br>GAG   | Repair template Forward oligo; used with oMH878 | this study           |
| DAD1-E50A-F             | oMH1393 | GAGACTATGAATTC AATCTTGAATGGTCTGAATGGTCTCAATATATCATTAGCTAG<br>CTCG  | Repair template Forward oligo                   | this study           |
| DAD1-E50A-R             | oMH1394 | ACAAATCAGAAACTGACTGGAATTCCTTCCACAGCTATCGAGCTAGCTAATGAT<br>ATAT     | Repair template Reverse oligo                   | this study           |
| Forward PCRtag for HTA2 | oMH308  | AGGTGGTAAAGCTGGTTCAGC                                              | histone genotyping                              | Haase et al. G3 2019 |
| Reverse PCRtag for HTA2 | oMH309  | CTCAGTTTCTTACAGTTCTTGAGAAGC                                        | histone genotyping                              | Haase et al. G3 2019 |
| Forward PCRtag for HTB2 | oDT133  | GGTAACAGCTCTAGTACCTTCAGAG                                          | histone genotyping                              | Haase et al. G3 2019 |
| Reverse PCRtag for HTB2 | oDT134  | GCCGAAAAGAAACCAGC                                                  | histone genotyping                              | Haase et al. G3 2019 |
| Forward PCRtag for HHT1 | oDT484  | GCTGCCAGAAAATCCGCC                                                 | histone genotyping                              | Haase et al. G3 2019 |
| Reverse PCRtag for HHT1 | oDT557  | GCCAACTTGATATCCTTCTTTGGATAGT                                       | histone genotyping                              | Haase et al. G3 2019 |
| Forward PCRtag for HHF1 | oDT488  | AGAGGTAAAGGTGGTAAAGGTCTA                                           | histone genotyping                              | Haase et al. G3 2019 |

|                            |        |                            |                    |                      |
|----------------------------|--------|----------------------------|--------------------|----------------------|
| Reverse PCRtag for HHF1    | oDT567 | GGATTTCAAGACNGCTCTGAC      | histone genotyping | Haase et al. G3 2019 |
| Forward PCRtag for hH2A.1  | oMH263 | CGAATCTCACCACAAGGCTAAGGG   | histone genotyping | Haase et al. G3 2019 |
| Reverse PCRtag for hH2A.1I | oMH243 | GTTGTGTGGAATTGTGAGCGGATAAC | histone genotyping | Haase et al. G3 2019 |
| Forward PCRtag for hH2B.3J | oMH264 | CTCCAGCTCCAAGAAGGGTTC      | histone genotyping | Haase et al. G3 2019 |
| Reverse PCRtag for hH2B.3J | oMH265 | GCTTGATATCGAATTCCTGCAGCC   | histone genotyping | Haase et al. G3 2019 |
| Forward PCRtag for hH3.1   | oMH262 | ATGGCTTTGCAAGAGGCCTG       | histone genotyping | Haase et al. G3 2019 |
| Reverse PCRtag for hH3.1   | oMH242 | GCTGGCGAAAGGGGGATG         | histone genotyping | Haase et al. G3 2019 |
| Forward PCRtag for hH4     | oDT565 | GGTGGTAAGGGTTTGGGTAAG      | histone genotyping | Haase et al. G3 2019 |
| Reverse PCRtag for hH4     | oDT566 | GAAAACCTTCAAAACACCTCTGGT   | histone genotyping | Haase et al. G3 2019 |

| <i>Appendix Table S6. Sporulation in Dad1-E50D diploids</i> |                 |                 |                 |              |
|-------------------------------------------------------------|-----------------|-----------------|-----------------|--------------|
| <b>Genotype</b>                                             | <b>2 spores</b> | <b>3 spores</b> | <b>Immature</b> | <b>Total</b> |
| <i>WT</i>                                                   | 0.85            | 0.85            | 3.42            | 117          |
| <i>HET Dad1-E50D</i>                                        | 4.96            | 5.51            | 23.69           | 363          |
| <i>HOMO Dad1-E50D</i>                                       | 6.92            | 6.92            | 15.38           | 130          |

*Values are % of total spores after 5 days in sporulation medium.*
